# Supplementary material for: Different Pathways Mediate Amphotericin-Lactoferrin Drug Synergy in Cryptococcus and Saccharomyces
Source: PubMed Central journal article supplement (PMC6779777; doi:10.3389/fmicb.2019.02195), 2019-10-01
Supplement: Image_1.pdf [file Image_1.pdf]

Supplementary Figure 1

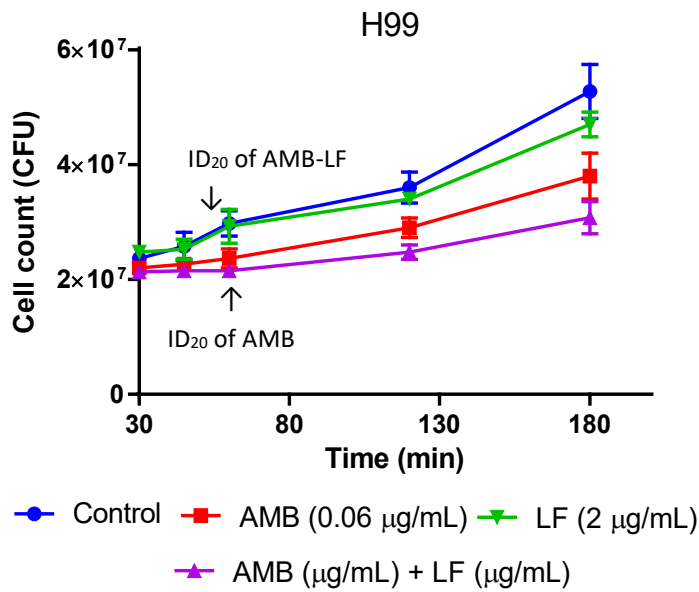

**Supplementary Figure 1. Inhibition of *C. neoformans* by AMB, LF and AMB-LF.** Drugs were added to a 50 mL culture containing  $2 \times 10^7$  cells/mL and samples were taken at 30, 45, 60, 120 and 180 min after the addition of drugs to assess level of inhibition. ID<sub>20</sub> occurred at 50 min for AMB-LF and 1 hr for AMB treatment. Data is shown as mean  $\pm$  standard error of the mean (SEM).
